# Supplementary material
Source: PubMed Central journal article supplement (PMC6821958)
Supplement: AEM.01579-19-s0001.pdf [file AEM.01579-19-s0001.pdf]

1 **Table S1.** *Campylobacter jejuni* and *C. coli* isolates characterized in this study

| Time Point (Days) | Sample Type <sup>1</sup> | Isolate      | Species                 | Antimicrobial Resistance Profile | ST <sup>2</sup> |
|-------------------|--------------------------|--------------|-------------------------|----------------------------------|-----------------|
| 0                 | W                        | WT0-2        | <i>C. jejuni</i>        | TSKQ                             |                 |
| 0                 | W                        | WT0-3        | <i>C. jejuni</i>        | TSKQ                             |                 |
| 0                 | W                        | WT0-4        | <i>C. coli</i>          | TKQ                              |                 |
| 0                 | W                        | WT0-5        | <i>C. jejuni</i>        | TSKQ                             |                 |
| 0                 | W                        | WT0-7        | <i>C. coli</i>          | TKQ                              |                 |
| 0                 | W                        | WT0-8        | <i>C. coli</i>          | TKQ                              |                 |
| 0                 | W                        | WT0-10       | <i>C. coli</i>          | TKQ                              |                 |
| <b>0</b>          | <b>M</b>                 | <b>MT0-1</b> | <b><i>C. coli</i></b>   | <b>TKQ</b>                       | <b>1192</b>     |
| <b>0</b>          | <b>M</b>                 | <b>MT0-2</b> | <b><i>C. jejuni</i></b> | <b>TSKQ</b>                      | <b>1839</b>     |
| 0                 | M                        | MT0-3        | <i>C. jejuni</i>        | TSKQ                             |                 |
| 0                 | M                        | MT0-4        | <i>C. coli</i>          | TKQ                              |                 |
| 0                 | M                        | MT0-5        | <i>C. jejuni</i>        | TSKQ                             |                 |
| 0                 | M                        | MT0-6        | <i>C. jejuni</i>        | TSKQ                             |                 |
| 0                 | M                        | MT0-8        | <i>C. coli</i>          | TKQ                              |                 |
| 0                 | M                        | MT0-10       | <i>C. coli</i>          | TKQ                              |                 |
| <b>2</b>          | <b>W</b>                 | <b>WT2-1</b> | <b><i>C. jejuni</i></b> | <b>TSKQ</b>                      | <b>1839</b>     |
| <b>2</b>          | <b>W</b>                 | <b>WT2-2</b> | <b><i>C. jejuni</i></b> | <b>TKQ</b>                       | <b>1839</b>     |
| 2                 | W                        | WT2-3        | <i>C. coli</i>          | TKQ                              |                 |
| 2                 | W                        | WT2-4        | <i>C. jejuni</i>        | TKQ                              |                 |
| 2                 | W                        | WT2-5        | <i>C. jejuni</i>        | TKQ                              |                 |
| 2                 | W                        | WT2-6        | <i>C. jejuni</i>        | TKQ                              |                 |
| 2                 | W                        | WT2-7        | <i>C. coli</i>          | TK                               |                 |
| 2                 | W                        | WT2-8        | <i>C. coli</i>          | TKQ                              |                 |
| 2                 | W                        | WT2-9        | <i>C. coli</i>          | TK                               |                 |
| 2                 | W                        | WT2-10       | <i>C. jejuni</i>        | TKQ                              |                 |
| 2                 | M                        | MT2-1        | <i>C. jejuni</i>        | TSKQ                             |                 |
| <b>2</b>          | <b>M</b>                 | <b>MT2-2</b> | <b><i>C. coli</i></b>   | <b>TK</b>                        | <b>1833</b>     |
| 2                 | M                        | MT2-3        | <i>C. coli</i>          | TKQ                              |                 |
| <b>2</b>          | <b>M</b>                 | <b>MT2-4</b> | <b><i>C. jejuni</i></b> | <b>TSKQ</b>                      | <b>1839</b>     |
| 2                 | M                        | MT2-5        | <i>C. coli</i>          | TKQ                              |                 |
| 2                 | M                        | MT2-6        | <i>C. coli</i>          | TKQ                              |                 |
| 2                 | M                        | MT2-7        | <i>C. coli</i>          | TKQ                              |                 |
| 2                 | M                        | MT2-9        | <i>C. jejuni</i>        | TSKQ                             |                 |
| 2                 | M                        | MT2-10       | <i>C. jejuni</i>        | TSKQ                             |                 |
| 4                 | W                        | WT4-2        | <i>C. coli</i>          | TKQ                              |                 |
| 4                 | W                        | WT4-3        | <i>C. coli</i>          | TKQ                              |                 |
| <b>4</b>          | <b>W</b>                 | <b>WT4-4</b> | <b><i>C. coli</i></b>   | <b>TSKQ</b>                      | <b>1192</b>     |

| Time Point (Days) | Sample Type <sup>1</sup> | Isolate | Species          | Antimicrobial Resistance Profile | ST <sup>2</sup> |
|-------------------|--------------------------|---------|------------------|----------------------------------|-----------------|
| 4                 | W                        | WT4-5   | <i>C. coli</i>   | TK                               |                 |
| 4                 | W                        | WT4-6   | <i>C. coli</i>   | TKQ                              |                 |
| 4                 | W                        | WT4-8   | <i>C. coli</i>   | TKQ                              |                 |
| 4                 | W                        | WT4-10  | <i>C. coli</i>   | TKQ                              |                 |
| 4                 | M                        | MT4-1   | <i>C. jejuni</i> | TSKQ                             |                 |
| 4                 | M                        | MT4-2   | <i>C. jejuni</i> | TSKQ                             |                 |
| 4                 | M                        | MT4-3   | <i>C. jejuni</i> | TSKQ                             |                 |
| 4                 | M                        | MT4-4   | <i>C. jejuni</i> | TSKQ                             |                 |
| 4                 | M                        | MT4-5   | <i>C. coli</i>   | TK                               |                 |
| 4                 | M                        | MT4-7   | <i>C. coli</i>   | TK                               |                 |
| 4                 | M                        | MT4-9   | <i>C. coli</i>   | TKQ                              |                 |
| 4                 | M                        | MT4-10  | <i>C. coli</i>   | TKQ                              |                 |
| 6                 | W                        | WT6-1   | <i>C. jejuni</i> | TSKQ                             |                 |
| 6                 | W                        | WT6-2   | <i>C. coli</i>   | TKQ                              |                 |
| 6                 | W                        | WT6-3   | <i>C. jejuni</i> | TKQ                              |                 |
| 6                 | W                        | WT6-4   | <i>C. jejuni</i> | TSKQ                             |                 |
| 6                 | W                        | WT6-5   | <i>C. jejuni</i> | TSKQ                             |                 |
| 6                 | W                        | WT6-6   | <i>C. jejuni</i> | TSKQ                             |                 |
| 6                 | W                        | WT6-7   | <i>C. jejuni</i> | TSKQ                             |                 |
| 6                 | W                        | WT6-9   | <i>C. coli</i>   | TK                               |                 |
| 6                 | W                        | WT6-10  | <i>C. jejuni</i> | TKQ                              |                 |
| 6                 | M                        | MT6-1   | <i>C. jejuni</i> | TSKQ                             |                 |
| 6                 | M                        | MT6-2   | <i>C. jejuni</i> | TSQ                              |                 |
| 6                 | M                        | MT6-3   | <i>C. jejuni</i> | TKQ                              |                 |
| 6                 | M                        | MT6-4   | <i>C. jejuni</i> | TKQ                              |                 |
| 6                 | M                        | MT6-5   | <i>C. jejuni</i> | TSKQ                             |                 |
| 6                 | M                        | MT6-6   | <i>C. coli</i>   | TKQ                              |                 |
| 6                 | M                        | MT6-7   | <i>C. coli</i>   | TKQ                              |                 |
| 6                 | M                        | MT6-8   | <i>C. jejuni</i> | TKQ                              |                 |
| 6                 | M                        | MT6-9   | <i>C. jejuni</i> | TSKQ                             |                 |
| 6                 | M                        | MT6-10  | <i>C. jejuni</i> | TSKQ                             |                 |
| 8                 | W                        | WT8-4   | <i>C. coli</i>   | TK                               |                 |
| 8                 | W                        | WT8-5   | <i>C. coli</i>   | TKQ                              |                 |
| 8                 | W                        | WT8-7   | <i>C. coli</i>   | PS                               |                 |
| 8                 | W                        | WT8-8   | <i>C. coli</i>   | TKQ                              |                 |
| 8                 | M                        | MT8-1   | <i>C. coli</i>   | TKQ                              |                 |
| 8                 | M                        | MT8-2   | <i>C. coli</i>   | TK                               |                 |
| 8                 | M                        | MT8-3   | <i>C. coli</i>   | TQ                               |                 |
| 8                 | M                        | MT8-4   | <i>C. coli</i>   | TK                               |                 |

| Time Point (Days) | Sample Type <sup>1</sup> | Isolate       | Species                 | Antimicrobial Resistance Profile | ST <sup>2</sup> |
|-------------------|--------------------------|---------------|-------------------------|----------------------------------|-----------------|
| 8                 | M                        | MT8-5         | <i>C. jejuni</i>        | TSKQ                             |                 |
| 8                 | M                        | MT8-6         | <i>C. coli</i>          | TKQ                              |                 |
| 8                 | M                        | MT8-7         | <i>C. coli</i>          | TKQ                              |                 |
| 8                 | M                        | MT8-8         | <i>C. coli</i>          | TK                               |                 |
| 8                 | M                        | MT8-9         | <i>C. jejuni</i>        | TSKQ                             |                 |
| 8                 | M                        | MT8-10        | <i>C. coli</i>          | TKQ                              |                 |
| 12                | W                        | WT12-7        | <i>C. coli</i>          | TK                               |                 |
| 12                | W                        | WT12-9        | <i>C. coli</i>          | TKQ                              |                 |
| 12                | M                        | MT12-1        | <i>C. coli</i>          | TK                               |                 |
| 12                | M                        | MT12-2        | <i>C. jejuni</i>        | TSKQ                             |                 |
| 12                | M                        | MT12-4        | <i>C. coli</i>          | TKQ                              |                 |
| <b>12</b>         | <b>M</b>                 | <b>MT12-5</b> | <b><i>C. jejuni</i></b> | <b>TSQ</b>                       | <b>2935</b>     |
| 12                | M                        | MT12-6        | <i>C. coli</i>          | TK                               |                 |
| 12                | M                        | MT12-7        | <i>C. jejuni</i>        | TSQ                              |                 |
| 12                | M                        | MT12-8        | <i>C. jejuni</i>        | TSKQ                             |                 |
| <b>12</b>         | <b>M</b>                 | <b>MT12-9</b> | <b><i>C. coli</i></b>   | <b>TKQ</b>                       | <b>9193</b>     |
| 12                | M                        | MT12-10       | <i>C. jejuni</i>        | TSKQ                             |                 |
| 14                | M                        | MT14-1        | <i>C. coli</i>          | TK                               |                 |
| 14                | M                        | MT14-2        | <i>C. jejuni</i>        | TSKQ                             |                 |
| 14                | M                        | MT14-3        | <i>C. jejuni</i>        | TSKQ                             |                 |
| <b>14</b>         | <b>M</b>                 | <b>MT14-4</b> | <b><i>C. jejuni</i></b> | <b>TSQ</b>                       | <b>2935</b>     |
| 14                | M                        | MT14-5        | <i>C. jejuni</i>        | TSKQ                             |                 |
| 14                | M                        | MT14-6        | <i>C. jejuni</i>        | TSKQ                             |                 |
| 14                | M                        | MT14-7        | <i>C. jejuni</i>        | TSQ                              |                 |
| 14                | M                        | MT14-8        | <i>C. jejuni</i>        | TSKQ                             |                 |
| 14                | M                        | MT14-9        | <i>C. jejuni</i>        | TSKQ                             |                 |
| 14                | M                        | MT14-10       | <i>C. jejuni</i>        | TSKQ                             |                 |
| 16                | M                        | MT16-1        | <i>C. jejuni</i>        | TSKQ                             |                 |
| <b>16</b>         | <b>M</b>                 | <b>MT16-2</b> | <b><i>C. jejuni</i></b> | <b>TSQ</b>                       | <b>2935</b>     |
| 16                | M                        | MT16-3        | <i>C. jejuni</i>        | TSKQ                             |                 |
| <b>16</b>         | <b>M</b>                 | <b>MT16-5</b> | <b><i>C. jejuni</i></b> | <b>TKQ</b>                       | <b>2934</b>     |
| 16                | M                        | MT16-7        | <i>C. jejuni</i>        | TSKQ                             |                 |
| 16                | M                        | MT16-8        | <i>C. jejuni</i>        | TSKQ                             |                 |
| <b>16</b>         | <b>M</b>                 | <b>MT16-9</b> | <b><i>C. coli</i></b>   | <b>TK</b>                        | <b>1833</b>     |
| 16                | M                        | MT16-10       | <i>C. jejuni</i>        | TSKQ                             |                 |
| 0                 | W                        | 2WT0-1        | <i>C. coli</i>          | TK                               |                 |
| 0                 | W                        | 2WT0-2        | <i>C. coli</i>          | TQ                               |                 |
| 0                 | W                        | 2WT0-3        | <i>C. coli</i>          | TQ                               |                 |
| 0                 | W                        | 2WT0-4        | <i>C. coli</i>          | TSEKQ                            |                 |

| Time Point (Days) | Sample Type <sup>1</sup> | Isolate        | Species                 | Antimicrobial Resistance Profile | ST <sup>2</sup> |
|-------------------|--------------------------|----------------|-------------------------|----------------------------------|-----------------|
| 0                 | W                        | 2WT0-5         | <i>C. coli</i>          | TK                               |                 |
| 0                 | W                        | 2WT0-6         | <i>C. coli</i>          | TSEKQ                            |                 |
| 0                 | W                        | 2WT0-7         | <i>C. coli</i>          | TQ                               |                 |
| 0                 | W                        | 2WT0-8         | <i>C. coli</i>          | TSEKQ                            |                 |
| 0                 | W                        | 2WT0-9         | <i>C. coli</i>          | TK                               |                 |
| 0                 | W                        | 2WT0-10        | <i>C. coli</i>          | TK                               |                 |
| 0                 | W                        | 2WT0-11        | <i>C. coli</i>          | TSEKQ                            |                 |
| 0                 | W                        | 2WT0-12        | <i>C. coli</i>          | TK                               |                 |
| <b>0</b>          | <b>W</b>                 | <b>2WT0-13</b> | <b><i>C. jejuni</i></b> | <b>TKQ</b>                       | <b>1839</b>     |
| 0                 | W                        | 2WT0-14        | <i>C. jejuni</i>        | TSKQ                             |                 |
| 0                 | W                        | 2WT0-15        | <i>C. coli</i>          | TSEKQ                            |                 |
| 0                 | W                        | 2WT0-16        | <i>C. coli</i>          | TSEKQ                            |                 |
| <b>0</b>          | <b>M</b>                 | <b>2MT0-1</b>  | <b><i>C. coli</i></b>   | <b>TSEKQ</b>                     | <b>1101</b>     |
| <b>0</b>          | <b>M</b>                 | <b>2MT0-2</b>  | <b><i>C. jejuni</i></b> | <b>TKQ</b>                       | <b>1839</b>     |
| <b>0</b>          | <b>M</b>                 | <b>2MT0-3</b>  | <b><i>C. coli</i></b>   | <b>TKQ</b>                       | <b>1833</b>     |
| 0                 | M                        | 2MT0-4         | <i>C. coli</i>          | TSEKQ                            |                 |
| 0                 | M                        | 2MT0-5         | <i>C. jejuni</i>        | TSKQ                             |                 |
| 0                 | M                        | 2MT0-6         | <i>C. jejuni</i>        | TSKQ                             |                 |
| 0                 | M                        | 2MT0-7         | <i>C. coli</i>          | TSEKQ                            |                 |
| 0                 | M                        | 2MT0-8         | <i>C. jejuni</i>        | T                                |                 |
| 0                 | M                        | 2MT0-9         | <i>C. coli</i>          | TKQ                              |                 |
| <b>0</b>          | <b>M</b>                 | <b>2MT0-10</b> | <b><i>C. coli</i></b>   | <b>TK</b>                        | <b>1833</b>     |
| 0                 | M                        | 2MT0-11        | <i>C. coli</i>          | TSEKQ                            |                 |
| 0                 | M                        | 2MT0-12        | <i>C. coli</i>          | TSEKQ                            |                 |
| <b>0</b>          | <b>M</b>                 | <b>2MT0-13</b> | <b><i>C. coli</i></b>   | <b>TQ</b>                        | <b>1161</b>     |
| 0                 | M                        | 2MT0-14        | <i>C. coli</i>          | TK                               |                 |
| 0                 | M                        | 2MT0-15        | <i>C. coli</i>          | TSEKQ                            |                 |
| 0                 | M                        | 2MT0-16        | <i>C. coli</i>          | TSEKQ                            |                 |
| 2                 | W                        | 2WT2-1         | <i>C. coli</i>          | TSEKQ                            |                 |
| 2                 | W                        | 2WT2-2         | <i>C. coli</i>          | TK                               |                 |
| 2                 | W                        | 2WT2-3         | <i>C. coli</i>          | TK                               |                 |
| 2                 | W                        | 2WT2-4         | <i>C. coli</i>          | TK                               |                 |
| 2                 | W                        | 2WT2-5         | <i>C. coli</i>          | TK                               |                 |
| 2                 | W                        | 2WT2-6         | <i>C. coli</i>          | TSEKQ                            |                 |
| 2                 | W                        | 2WT2-8         | <i>C. coli</i>          | TQ                               |                 |
| 2                 | W                        | 2WT2-9         | <i>C. coli</i>          | TSEKQ                            |                 |
| 2                 | W                        | 2WT2-10        | <i>C. coli</i>          | TK                               |                 |
| 2                 | W                        | 2WT2-11        | <i>C. jejuni</i>        | T                                |                 |
| 2                 | W                        | 2WT2-12        | <i>C. coli</i>          | TSEKQ                            |                 |

| Time Point (Days) | Sample Type <sup>1</sup> | Isolate       | Species               | Antimicrobial Resistance Profile | ST <sup>2</sup> |
|-------------------|--------------------------|---------------|-----------------------|----------------------------------|-----------------|
| 2                 | W                        | 2WT2-13       | <i>C. coli</i>        | TK                               |                 |
| 2                 | W                        | 2WT2-14       | <i>C. coli</i>        | TK                               |                 |
| 2                 | W                        | 2WT2-15       | <i>C. coli</i>        | TSEKQ                            |                 |
| 2                 | W                        | 2WT2-16       | <i>C. coli</i>        | TK                               |                 |
| 2                 | M                        | 2MT2-3        | <i>C. coli</i>        | TKQ                              |                 |
| <b>2</b>          | <b>M</b>                 | <b>2MT2-4</b> | <b><i>C. coli</i></b> | <b>TEKQ</b>                      | <b>7731</b>     |
| 2                 | M                        | 2MT2-5        | <i>C. coli</i>        | TSEKQ                            |                 |
| 2                 | M                        | 2MT2-6        | <i>C. coli</i>        | TSEKQ                            |                 |
| 2                 | M                        | 2MT2-7        | <i>C. jejuni</i>      | T                                |                 |
| <b>2</b>          | <b>M</b>                 | <b>2MT2-8</b> | <b><i>C. coli</i></b> | <b>TK</b>                        | <b>1833</b>     |
| 2                 | M                        | 2MT2-11       | <i>C. coli</i>        | TK                               |                 |
| 2                 | M                        | 2MT2-12       | <i>C. coli</i>        | TK                               |                 |
| 2                 | M                        | 2MT2-13       | <i>C. coli</i>        | TSEKQ                            |                 |
| 2                 | M                        | 2MT2-14       | <i>C. coli</i>        | TK                               |                 |
| 2                 | M                        | 2MT2-15       | <i>C. coli</i>        | TK                               |                 |
| 2                 | M                        | 2MT2-16       | <i>C. coli</i>        | TK                               |                 |
| 4                 | W                        | 2WT4-1        | <i>C. coli</i>        | TQ                               |                 |
| 4                 | W                        | 2WT4-2        | <i>C. coli</i>        | TKQ                              |                 |
| 4                 | W                        | 2WT4-3        | <i>C. coli</i>        | TK                               |                 |
| 4                 | W                        | 2WT4-4        | <i>C. coli</i>        | TK                               |                 |
| 4                 | W                        | 2WT4-5        | <i>C. coli</i>        | TKQ                              |                 |
| 4                 | W                        | 2WT4-6        | <i>C. coli</i>        | TKQ                              |                 |
| 4                 | W                        | 2WT4-7        | <i>C. coli</i>        | TK                               |                 |
| 4                 | W                        | 2WT4-8        | <i>C. coli</i>        | TKQ                              |                 |
| 4                 | W                        | 2WT4-9        | <i>C. coli</i>        | TQ                               |                 |
| 4                 | W                        | 2WT4-11       | <i>C. coli</i>        | TQ                               |                 |
| 4                 | W                        | 2WT4-12       | <i>C. coli</i>        | TK                               |                 |
| 4                 | W                        | 2WT4-13       | <i>C. coli</i>        | TK                               |                 |
| 4                 | W                        | 2WT4-14       | <i>C. coli</i>        | TQ                               |                 |
| 4                 | W                        | 2WT4-15       | <i>C. coli</i>        | TSEKQ                            |                 |
| 4                 | W                        | 2WT4-16       | <i>C. coli</i>        | TQ                               |                 |
| 4                 | M                        | 2MT4-1        | <i>C. jejuni</i>      | TKQ                              |                 |
| 4                 | M                        | 2MT4-2        | <i>C. coli</i>        | TK                               |                 |
| <b>4</b>          | <b>M</b>                 | <b>2MT4-3</b> | <b><i>C. coli</i></b> | <b>TQ</b>                        | <b>1161</b>     |
| 4                 | M                        | 2MT4-4        | <i>C. coli</i>        | TQ                               |                 |
| 4                 | M                        | 2MT4-5        | <i>C. coli</i>        | TK                               |                 |
| 4                 | M                        | 2MT4-6        | <i>C. coli</i>        | TQ                               |                 |
| 4                 | M                        | 2MT4-7        | <i>C. coli</i>        | TK                               |                 |
| 4                 | M                        | 2MT4-8        | <i>C. jejuni</i>      | TKQ                              |                 |

| Time Point (Days) | Sample Type <sup>1</sup> | Isolate | Species          | Antimicrobial Resistance Profile | ST <sup>2</sup> |
|-------------------|--------------------------|---------|------------------|----------------------------------|-----------------|
| 4                 | M                        | 2MT4-9  | <i>C. coli</i>   | TKQ                              |                 |
| 4                 | M                        | 2MT4-10 | <i>C. coli</i>   | TQ                               |                 |
| 4                 | M                        | 2MT4-11 | <i>C. coli</i>   | TK                               |                 |
| 4                 | M                        | 2MT4-12 | <i>C. coli</i>   | TK                               |                 |
| 4                 | M                        | 2MT4-13 | <i>C. coli</i>   | TKQ                              |                 |
| 4                 | M                        | 2MT4-14 | <i>C. jejuni</i> | TKQ                              |                 |
| 4                 | M                        | 2MT4-15 | <i>C. coli</i>   | TK                               |                 |
| 4                 | M                        | 2MT4-16 | <i>C. coli</i>   | TK                               |                 |
| 6                 | W                        | 2WT6-1  | <i>C. coli</i>   | TEKQ                             |                 |
| 6                 | W                        | 2WT6-3  | <i>C. coli</i>   | TSEKQ                            |                 |
| 6                 | W                        | 2WT6-6  | <i>C. coli</i>   | TK                               |                 |
| 6                 | M                        | 2MT6-1  | <i>C. coli</i>   | TK                               |                 |
| 6                 | M                        | 2MT6-2  | <i>C. coli</i>   | TK                               |                 |
| 6                 | M                        | 2MT6-3  | <i>C. jejuni</i> | TSKQ                             |                 |
| 6                 | M                        | 2MT6-4  | <i>C. coli</i>   | TKQ                              |                 |
| 6                 | M                        | 2MT6-5  | <i>C. coli</i>   | TK                               |                 |
| 6                 | M                        | 2MT6-6  | <i>C. coli</i>   | TK                               |                 |
| 6                 | M                        | 2MT6-7  | <i>C. coli</i>   | TK                               |                 |
| 6                 | M                        | 2MT6-8  | <i>C. coli</i>   | TK                               |                 |
| 6                 | M                        | 2MT6-11 | <i>C. coli</i>   | TK                               |                 |
| 6                 | M                        | 2MT6-12 | <i>C. jejuni</i> | TK                               |                 |
| 6                 | M                        | 2MT6-13 | <i>C. coli</i>   | TK                               |                 |
| 6                 | M                        | 2MT6-14 | <i>C. coli</i>   | TQ                               |                 |
| 6                 | M                        | 2MT6-15 | <i>C. coli</i>   | TK                               |                 |
| 8                 | W                        | 2WT8-1  | <i>C. coli</i>   | TQ                               |                 |
| 8                 | W                        | 2WT8-2  | <i>C. coli</i>   | TK                               |                 |
| 8                 | W                        | 2WT8-3  | <i>C. coli</i>   | TK                               |                 |
| 8                 | W                        | 2WT8-4  | <i>C. coli</i>   | TK                               |                 |
| 8                 | W                        | 2WT8-5  | <i>C. coli</i>   | T                                |                 |
| 8                 | W                        | 2WT8-6  | <i>C. coli</i>   | TK                               |                 |
| 8                 | W                        | 2WT8-7  | <i>C. coli</i>   | TKQ                              |                 |
| 8                 | W                        | 2WT8-8  | <i>C. coli</i>   | TQ                               |                 |
| 8                 | W                        | 2WT8-9  | <i>C. coli</i>   | TEKQ                             |                 |
| 8                 | W                        | 2WT8-10 | <i>C. coli</i>   | TK                               |                 |
| 8                 | W                        | 2WT8-11 | <i>C. coli</i>   | TKQ                              |                 |
| 8                 | W                        | 2WT8-12 | <i>C. coli</i>   | TK                               |                 |
| 8                 | W                        | 2WT8-13 | <i>C. coli</i>   | TQ                               |                 |
| 8                 | W                        | 2WT8-14 | <i>C. coli</i>   | TK                               |                 |
| 8                 | W                        | 2WT8-15 | <i>C. coli</i>   | TKQ                              |                 |

| Time Point (Days) | Sample Type <sup>1</sup> | Isolate         | Species               | Antimicrobial Resistance Profile | ST <sup>2</sup> |
|-------------------|--------------------------|-----------------|-----------------------|----------------------------------|-----------------|
| 8                 | W                        | 2WT8-16         | <i>C. coli</i>        | TK                               |                 |
| 8                 | M                        | 2MT8-1          | <i>C. jejuni</i>      | TK                               |                 |
| <b>8</b>          | <b>M</b>                 | <b>2MT8-2</b>   | <b><i>C. coli</i></b> | <b>TQ</b>                        | <b>1161</b>     |
| 8                 | M                        | 2MT8-3          | <i>C. jejuni</i>      | TSKQ                             |                 |
| 8                 | M                        | 2MT8-4          | <i>C. jejuni</i>      | TSKQ                             |                 |
| 8                 | M                        | 2MT8-6          | <i>C. jejuni</i>      | TSKQ                             |                 |
| 8                 | M                        | 2MT8-7          | <i>C. jejuni</i>      | TSKQ                             |                 |
| 8                 | M                        | 2MT8-8          | <i>C. coli</i>        | TKQ                              |                 |
| 8                 | M                        | 2MT8-9          | <i>C. coli</i>        | TK                               |                 |
| 8                 | M                        | 2MT8-10         | <i>C. coli</i>        | TKQ                              |                 |
| 8                 | M                        | 2MT8-11         | <i>C. coli</i>        | TK                               |                 |
| 8                 | M                        | 2MT8-12         | <i>C. coli</i>        | TK                               |                 |
| 8                 | M                        | 2MT8-13         | <i>C. jejuni</i>      | TSKQ                             |                 |
| 8                 | M                        | 2MT8-14         | <i>C. coli</i>        | TK                               |                 |
| 8                 | M                        | 2MT8-16         | <i>C. coli</i>        | TKQ                              |                 |
| 10                | W                        | 2WT10-1         | <i>C. coli</i>        | TQ                               |                 |
| 10                | W                        | 2WT10-2         | <i>C. coli</i>        | TQ                               |                 |
| 10                | W                        | 2WT10-5         | <i>C. coli</i>        | TQ                               |                 |
| 10                | W                        | 2WT10-7         | <i>C. coli</i>        | TK                               |                 |
| 10                | W                        | 2WT10-10        | <i>C. coli</i>        | TKQ                              |                 |
| 10                | W                        | 2WT10-12        | <i>C. coli</i>        | TKQ                              |                 |
| 10                | W                        | 2WT10-13        | <i>C. coli</i>        | TK                               |                 |
| 10                | W                        | 2WT10-15        | <i>C. coli</i>        | TKQ                              |                 |
| 10                | M                        | 2MT10-1         | <i>C. coli</i>        | TK                               |                 |
| 10                | M                        | 2MT10-2         | <i>C. coli</i>        | TKQ                              |                 |
| 10                | M                        | 2MT10-3         | <i>C. coli</i>        | TK                               |                 |
| 10                | M                        | 2MT10-5         | <i>C. coli</i>        | TK                               |                 |
| 10                | M                        | 2MT10-7         | <i>C. coli</i>        | TK                               |                 |
| 10                | M                        | 2MT10-8         | <i>C. coli</i>        | TK                               |                 |
| <b>10</b>         | <b>M</b>                 | <b>2MT10-10</b> | <b><i>C. coli</i></b> | <b>TKQ</b>                       | <b>1833</b>     |
| <b>10</b>         | <b>M</b>                 | <b>2MT10-11</b> | <b><i>C. coli</i></b> | <b>TKQ</b>                       | <b>1192</b>     |
| <b>10</b>         | <b>M</b>                 | <b>2MT10-12</b> | <b><i>C. coli</i></b> | <b>TK</b>                        | <b>1833</b>     |
| 10                | M                        | 2MT10-13        | <i>C. coli</i>        | TK                               |                 |
| <b>10</b>         | <b>M</b>                 | <b>2MT10-16</b> | <b><i>C. coli</i></b> | <b>TK</b>                        | <b>1833</b>     |
| 12                | W                        | 2WT12-1         | <i>C. coli</i>        | TKQ                              |                 |
| 12                | W                        | 2WT12-2         | <i>C. coli</i>        | TQ                               |                 |
| 12                | W                        | 2WT12-4         | <i>C. coli</i>        | TKQ                              |                 |
| 12                | W                        | 2WT12-5         | <i>C. coli</i>        | TK                               |                 |
| 12                | W                        | 2WT12-7         | <i>C. coli</i>        | TKQ                              |                 |

| Time Point (Days) | Sample Type <sup>1</sup> | Isolate  | Species          | Antimicrobial Resistance Profile | ST <sup>2</sup> |
|-------------------|--------------------------|----------|------------------|----------------------------------|-----------------|
| 12                | W                        | 2WT12-8  | <i>C. coli</i>   | TKQ                              |                 |
| 12                | W                        | 2WT12-9  | <i>C. coli</i>   | TK                               |                 |
| 12                | W                        | 2WT12-10 | <i>C. coli</i>   | TKQ                              |                 |
| 12                | W                        | 2WT12-11 | <i>C. coli</i>   | TQ                               |                 |
| 12                | W                        | 2WT12-12 | <i>C. coli</i>   | TQ                               |                 |
| 12                | W                        | 2WT12-13 | <i>C. coli</i>   | TK                               |                 |
| 12                | W                        | 2WT12-15 | <i>C. coli</i>   | TKQ                              |                 |
| 12                | W                        | 2WT12-16 | <i>C. coli</i>   | TK                               |                 |
| 14                | W                        | 2WT14-1  | <i>C. coli</i>   | TQ                               |                 |
| 14                | W                        | 2WT14-2  | <i>C. coli</i>   | TQ                               |                 |
| 14                | W                        | 2WT14-3  | <i>C. coli</i>   | TK                               |                 |
| 14                | W                        | 2WT14-4  | <i>C. coli</i>   | TK                               |                 |
| 14                | W                        | 2WT14-5  | <i>C. coli</i>   | TQ                               |                 |
| 14                | W                        | 2WT14-6  | <i>C. coli</i>   | TK                               |                 |
| 14                | W                        | 2WT14-7  | <i>C. coli</i>   | TK                               |                 |
| 14                | W                        | 2WT14-8  | <i>C. coli</i>   | TQ                               |                 |
| 14                | W                        | 2WT14-9  | <i>C. coli</i>   | TK                               |                 |
| 14                | W                        | 2WT14-10 | <i>C. coli</i>   | TKQ                              |                 |
| 14                | W                        | 2WT14-11 | <i>C. coli</i>   | TQ                               |                 |
| 14                | W                        | 2WT14-12 | <i>C. coli</i>   | TQ                               |                 |
| 14                | W                        | 2WT14-13 | <i>C. coli</i>   | TK                               |                 |
| 14                | W                        | 2WT14-14 | <i>C. coli</i>   | TQ                               |                 |
| 14                | W                        | 2WT14-15 | <i>C. coli</i>   | TK                               |                 |
| 14                | W                        | 2WT14-16 | <i>C. coli</i>   | TK                               |                 |
| 16                | W                        | 2WT16-3  | <i>C. coli</i>   | TQ                               |                 |
| 16                | W                        | 2WT16-7  | <i>C. coli</i>   | TK                               |                 |
| 0                 | W                        | 3WT0-1   | <i>C. coli</i>   | TK                               |                 |
| 0                 | W                        | 3WT0-2   | <i>C. coli</i>   | TQ                               |                 |
| 0                 | W                        | 3WT0-3   | <i>C. coli</i>   | TQ                               |                 |
| 0                 | W                        | 3WT0-4   | <i>C. coli</i>   | TQ                               |                 |
| 0                 | W                        | 3WT0-5   | <i>C. coli</i>   | TQ                               |                 |
| 0                 | W                        | 3WT0-6   | <i>C. coli</i>   | TQ                               |                 |
| 0                 | W                        | 3WT0-7   | <i>C. jejuni</i> | TSKQ                             |                 |
| 0                 | W                        | 3WT0-8   | <i>C. coli</i>   | TKQ                              |                 |
| 0                 | W                        | 3WT0-9   | <i>C. coli</i>   | TK                               |                 |
| 0                 | W                        | 3WT0-10  | <i>C. coli</i>   | TQ                               |                 |
| 0                 | W                        | 3WT0-11  | <i>C. coli</i>   | TQ                               |                 |
| 0                 | W                        | 3WT0-12  | <i>C. coli</i>   | TQ                               |                 |
| 0                 | W                        | 3WT0-13  | <i>C. coli</i>   | TQ                               |                 |



| Time Point (Days) | Sample Type <sup>1</sup> | Isolate | Species          | Antimicrobial Resistance Profile | ST <sup>2</sup> |
|-------------------|--------------------------|---------|------------------|----------------------------------|-----------------|
| 0                 | W                        | 3WT0-14 | <i>C. coli</i>   | TQ                               |                 |
| 0                 | W                        | 3WT0-15 | <i>C. coli</i>   | TQ                               |                 |
| 0                 | W                        | 3WT0-16 | <i>C. coli</i>   | TKQ                              |                 |
| 0                 | M                        | 3MT0-1  | <i>C. coli</i>   | TQ                               |                 |
| 0                 | M                        | 3MT0-3  | <i>C. coli</i>   | TK                               |                 |
| 0                 | M                        | 3MT0-4  | <i>C. coli</i>   | TQ                               |                 |
| 0                 | M                        | 3MT0-5  | <i>C. coli</i>   | TK                               |                 |
| 0                 | M                        | 3MT0-6  | <i>C. coli</i>   | TQ                               |                 |
| 0                 | M                        | 3MT0-7  | <i>C. coli</i>   | TK                               |                 |
| 0                 | M                        | 3MT0-8  | <i>C. coli</i>   | TQ                               |                 |
| 0                 | M                        | 3MT0-9  | <i>C. coli</i>   | TQ                               |                 |
| 0                 | M                        | 3MT0-10 | <i>C. coli</i>   | TQ                               |                 |
| 0                 | M                        | 3MT0-11 | <i>C. coli</i>   | TQ                               |                 |
| 0                 | M                        | 3MT0-13 | <i>C. coli</i>   | TQ                               |                 |
| 0                 | M                        | 3MT0-14 | <i>C. coli</i>   | TQ                               |                 |
| 0                 | M                        | 3MT0-15 | <i>C. coli</i>   | TK                               |                 |
| 0                 | M                        | 3MT0-16 | <i>C. coli</i>   | TKQ                              |                 |
| 2                 | W                        | 3WT2-1  | <i>C. coli</i>   | TQ                               |                 |
| 2                 | W                        | 3WT2-2  | <i>C. coli</i>   | TQ                               |                 |
| 2                 | W                        | 3WT2-3  | <i>C. coli</i>   | TQ                               |                 |
| 2                 | W                        | 3WT2-4  | <i>C. coli</i>   | T                                |                 |
| 2                 | M                        | 3MT2-1  | <i>C. jejuni</i> | TSKQ                             |                 |
| 2                 | M                        | 3MT2-2  | <i>C. coli</i>   | TQ                               |                 |
| 2                 | M                        | 3MT2-3  | <i>C. jejuni</i> | TSKQ                             |                 |
| 2                 | M                        | 3MT2-4  | <i>C. jejuni</i> | TSKQ                             |                 |
| 2                 | M                        | 3MT2-5  | <i>C. jejuni</i> | TSKQ                             |                 |
| 2                 | M                        | 3MT2-6  | <i>C. jejuni</i> | TSKQ                             |                 |
| 2                 | M                        | 3MT2-7  | <i>C. jejuni</i> | TSKQ                             |                 |
| 2                 | M                        | 3MT2-8  | <i>C. jejuni</i> | TSKQ                             |                 |
| 2                 | M                        | 3MT2-9  | <i>C. jejuni</i> | TSKQ                             |                 |
| 2                 | M                        | 3MT2-10 | <i>C. jejuni</i> | TSKQ                             |                 |
| 2                 | M                        | 3MT2-11 | <i>C. coli</i>   | TQ                               |                 |
| 2                 | M                        | 3MT2-12 | <i>C. jejuni</i> | TSKQ                             |                 |
| 2                 | M                        | 3MT2-13 | <i>C. jejuni</i> | TSKQ                             |                 |
| 2                 | M                        | 3MT2-14 | <i>C. jejuni</i> | TKQ                              |                 |
| 2                 | M                        | 3MT2-15 | <i>C. jejuni</i> | TSKQ                             |                 |
| 2                 | M                        | 3MT2-16 | <i>C. jejuni</i> | TSKQ                             |                 |
| 4                 | M                        | 3MT4-1  | <i>C. coli</i>   | TKQ                              |                 |
| 0                 | W                        | 4WT0-1  | <i>C. jejuni</i> | TSKQ                             |                 |

| Time Point (Days) | Sample Type <sup>1</sup> | Isolate       | Species                 | Antimicrobial Resistance Profile | ST <sup>2</sup> |
|-------------------|--------------------------|---------------|-------------------------|----------------------------------|-----------------|
| 0                 | W                        | 4WT0-2        | <i>C. jejuni</i>        | TSKQ                             |                 |
| 0                 | W                        | 4WT0-3        | <i>C. jejuni</i>        | TSKQ                             |                 |
| 0                 | W                        | 4WT0-4        | <i>C. jejuni</i>        | TSKQ                             |                 |
| 0                 | W                        | 4WT0-5        | <i>C. jejuni</i>        | TSKQ                             |                 |
| 0                 | W                        | 4WT0-6        | <i>C. jejuni</i>        | TSKQ                             |                 |
| 0                 | W                        | 4WT0-7        | <i>C. jejuni</i>        | TSKQ                             |                 |
| 0                 | W                        | 4WT0-8        | <i>C. jejuni</i>        | TSKQ                             |                 |
| 0                 | W                        | 4WT0-9        | <i>C. jejuni</i>        | TSKQ                             |                 |
| 0                 | W                        | 4WT0-10       | <i>C. jejuni</i>        | TSKQ                             |                 |
| 0                 | W                        | 4WT0-11       | <i>C. jejuni</i>        | TSKQ                             |                 |
| 0                 | W                        | 4WT0-12       | <i>C. jejuni</i>        | TSKQ                             |                 |
| 0                 | W                        | 4WT0-13       | <i>C. jejuni</i>        | TSKQ                             |                 |
| 0                 | W                        | 4WT0-14       | <i>C. jejuni</i>        | TSKQ                             |                 |
| 0                 | W                        | 4WT0-15       | <i>C. jejuni</i>        | TSKQ                             |                 |
| 0                 | W                        | 4WT0-16       | <i>C. jejuni</i>        | TSKQ                             |                 |
| 0                 | M                        | 4MT0-1        | <i>C. jejuni</i>        | TSKQ                             |                 |
| <b>0</b>          | <b>M</b>                 | <b>4MT0-2</b> | <b><i>C. coli</i></b>   | <b>TSEKQ</b>                     | <b>1101</b>     |
| 0                 | M                        | 4MT0-3        | <i>C. jejuni</i>        | TSKQ                             |                 |
| 0                 | M                        | 4MT0-4        | <i>C. jejuni</i>        | TSKQ                             |                 |
| 0                 | M                        | 4MT0-5        | <i>C. coli</i>          | TSEKQ                            |                 |
| 0                 | M                        | 4MT0-6        | <i>C. jejuni</i>        | TSKQ                             |                 |
| 0                 | M                        | 4MT0-7        | <i>C. jejuni</i>        | TSKQ                             |                 |
| 0                 | M                        | 4MT0-8        | <i>C. jejuni</i>        | TSKQ                             |                 |
| 0                 | M                        | 4MT0-9        | <i>C. jejuni</i>        | TSKQ                             |                 |
| 0                 | M                        | 4MT0-10       | <i>C. jejuni</i>        | TSKQ                             |                 |
| 0                 | M                        | 4MT0-11       | <i>C. jejuni</i>        | TSKQ                             |                 |
| 0                 | M                        | 4MT0-12       | <i>C. jejuni</i>        | TSKQ                             |                 |
| 0                 | M                        | 4MT0-13       | <i>C. coli</i>          | TKQ                              |                 |
| 0                 | M                        | 4MT0-14       | <i>C. jejuni</i>        | TSKQ                             |                 |
| 0                 | M                        | 4MT0-15       | <i>C. jejuni</i>        | TSKQ                             |                 |
| 0                 | M                        | 4MT0-16       | <i>C. jejuni</i>        | TSKQ                             |                 |
| 2                 | W                        | 4WT2-1        | <i>C. jejuni</i>        | TSKQ                             |                 |
| 2                 | W                        | 4WT2-2        | <i>C. jejuni</i>        | TSKQ                             |                 |
| 2                 | W                        | 4WT2-3        | <i>C. coli</i>          | TKQ                              |                 |
| 2                 | W                        | 4WT2-4        | <i>C. jejuni</i>        | TSKQ                             |                 |
| <b>2</b>          | <b>W</b>                 | <b>4WT2-5</b> | <b><i>C. jejuni</i></b> | <b>TKQ</b>                       | <b>1839</b>     |
| 2                 | W                        | 4WT2-6        | <i>C. jejuni</i>        | TSKQ                             |                 |
| 2                 | W                        | 4WT2-7        | <i>C. jejuni</i>        | TKQ                              |                 |
| 2                 | W                        | 4WT2-8        | <i>C. jejuni</i>        | TKQ                              |                 |

| Time Point (Days) | Sample Type <sup>1</sup> | Isolate       | Species                 | Antimicrobial Resistance Profile | ST <sup>2</sup> |
|-------------------|--------------------------|---------------|-------------------------|----------------------------------|-----------------|
| 2                 | W                        | 4WT2-9        | <i>C. jejuni</i>        | TKQ                              |                 |
| 2                 | W                        | 4WT2-10       | <i>C. jejuni</i>        | TKQ                              |                 |
| 2                 | W                        | 4WT2-11       | <i>C. jejuni</i>        | TKQ                              |                 |
| 2                 | W                        | 4WT2-12       | <i>C. jejuni</i>        | TKQ                              |                 |
| 2                 | W                        | 4WT2-13       | <i>C. jejuni</i>        | TKQ                              |                 |
| 2                 | W                        | 4WT2-14       | <i>C. jejuni</i>        | TKQ                              |                 |
| 2                 | W                        | 4WT2-15       | <i>C. jejuni</i>        | TSKQ                             |                 |
| 2                 | W                        | 4WT2-16       | <i>C. jejuni</i>        | TSKQ                             |                 |
| 2                 | M                        | 4MT2-1        | <i>C. jejuni</i>        | TSKQ                             |                 |
| 2                 | M                        | 4MT2-2        | <i>C. jejuni</i>        | TSKQ                             |                 |
| <b>2</b>          | <b>M</b>                 | <b>4MT2-3</b> | <b><i>C. jejuni</i></b> | <b>TKQ</b>                       | <b>1839</b>     |
| 2                 | M                        | 4MT2-4        | <i>C. coli</i>          | TK                               |                 |
| 2                 | M                        | 4MT2-5        | <i>C. jejuni</i>        | TSKQ                             |                 |
| 2                 | M                        | 4MT2-6        | <i>C. jejuni</i>        | TKQ                              |                 |
| 2                 | M                        | 4MT2-7        | <i>C. coli</i>          | TK                               |                 |
| 2                 | M                        | 4MT2-8        | <i>C. jejuni</i>        | TKQ                              |                 |
| 2                 | M                        | 4MT2-9        | <i>C. coli</i>          | TK                               |                 |
| 2                 | M                        | 4MT2-10       | <i>C. jejuni</i>        | TSKQ                             |                 |
| 2                 | M                        | 4MT2-11       | <i>C. jejuni</i>        | TKQ                              |                 |
| 2                 | M                        | 4MT2-12       | <i>C. jejuni</i>        | TSKQ                             |                 |
| 2                 | M                        | 4MT2-13       | <i>C. jejuni</i>        | TSKQ                             |                 |
| 2                 | M                        | 4MT2-14       | <i>C. jejuni</i>        | TKQ                              |                 |
| 2                 | M                        | 4MT2-15       | <i>C. jejuni</i>        | TSKQ                             |                 |
| 2                 | M                        | 4MT2-16       | <i>C. jejuni</i>        | TSKQ                             |                 |
| 4                 | W                        | 4WT4-1        | <i>C. coli</i>          | TKQ                              |                 |
| 4                 | W                        | 4WT4-2        | <i>C. jejuni</i>        | TSKQ                             |                 |
| 4                 | W                        | 4WT4-3        | <i>C. jejuni</i>        | TSKQ                             |                 |
| 4                 | W                        | 4WT4-4        | <i>C. coli</i>          | TKQ                              |                 |
| 4                 | W                        | 4WT4-5        | <i>C. coli</i>          | TK                               |                 |
| 4                 | W                        | 4WT4-6        | <i>C. coli</i>          | TK                               |                 |
| 4                 | W                        | 4WT4-7        | <i>C. jejuni</i>        | TSKQ                             |                 |
| 4                 | W                        | 4WT4-8        | <i>C. jejuni</i>        | TSKQ                             |                 |
| 4                 | W                        | 4WT4-9        | <i>C. jejuni</i>        | TSKQ                             |                 |
| 4                 | W                        | 4WT4-10       | <i>C. jejuni</i>        | TSKQ                             |                 |
| 4                 | W                        | 4WT4-11       | <i>C. jejuni</i>        | TKQ                              |                 |
| 4                 | W                        | 4WT4-12       | <i>C. jejuni</i>        | TSKQ                             |                 |
| 4                 | W                        | 4WT4-13       | <i>C. coli</i>          | TKQ                              |                 |
| 4                 | W                        | 4WT4-14       | <i>C. coli</i>          | TKQ                              |                 |
| 4                 | W                        | 4WT4-15       | <i>C. jejuni</i>        | TSKQ                             |                 |

| Time Point (Days) | Sample Type <sup>1</sup> | Isolate  | Species          | Antimicrobial Resistance Profile | ST <sup>2</sup> |
|-------------------|--------------------------|----------|------------------|----------------------------------|-----------------|
| 4                 | W                        | 4WT4-16  | <i>C. coli</i>   | TK                               |                 |
| 4                 | M                        | 4MT4 -1  | <i>C. jejuni</i> | TSKQ                             |                 |
| 4                 | M                        | 4MT4 -2  | <i>C. jejuni</i> | TSKQ                             |                 |
| 4                 | M                        | 4MT4 -3  | <i>C. jejuni</i> | TKQ                              |                 |
| 4                 | M                        | 4MT4 -4  | <i>C. jejuni</i> | TSKQ                             |                 |
| 4                 | M                        | 4MT4 -5  | <i>C. jejuni</i> | TSKQ                             |                 |
| 4                 | M                        | 4MT4 -6  | <i>C. jejuni</i> | TSKQ                             |                 |
| 4                 | M                        | 4MT4 -7  | <i>C. coli</i>   | TKQ                              |                 |
| 4                 | M                        | 4MT4 -8  | <i>C. jejuni</i> | TSKQ                             |                 |
| 4                 | M                        | 4MT4 -9  | <i>C. coli</i>   | TKQ                              |                 |
| 4                 | M                        | 4MT4 -10 | <i>C. coli</i>   | TKQ                              |                 |
| 4                 | M                        | 4MT4 -11 | <i>C. jejuni</i> | TSKQ                             |                 |
| 4                 | M                        | 4MT4 -12 | <i>C. jejuni</i> | TSKQ                             |                 |
| 4                 | M                        | 4MT4 -13 | <i>C. jejuni</i> | TSKQ                             |                 |
| 4                 | M                        | 4MT4 -14 | <i>C. coli</i>   | TK                               |                 |
| 4                 | M                        | 4MT4 -15 | <i>C. jejuni</i> | TSKQ                             |                 |
| 4                 | M                        | 4MT4 -16 | <i>C. coli</i>   | TKQ                              |                 |
| 6                 | W                        | 4WT6-1   | <i>C. coli</i>   | TKQ                              |                 |
| 6                 | W                        | 4WT6-2   | <i>C. jejuni</i> | TKQ                              |                 |
| 6                 | W                        | 4WT6-3   | <i>C. jejuni</i> | TSKQ                             |                 |
| 6                 | W                        | 4WT6-4   | <i>C. jejuni</i> | TKQ                              |                 |
| 6                 | W                        | 4WT6-5   | <i>C. coli</i>   | TK                               |                 |
| 6                 | W                        | 4WT6-6   | <i>C. coli</i>   | TK                               |                 |
| 6                 | W                        | 4WT6-7   | <i>C. coli</i>   | TK                               |                 |
| 6                 | W                        | 4WT6-8   | <i>C. coli</i>   | TK                               |                 |
| 6                 | W                        | 4WT6-9   | <i>C. jejuni</i> | TSKQ                             |                 |
| 6                 | W                        | 4WT6-10  | <i>C. coli</i>   | TK                               |                 |
| 6                 | W                        | 4WT6-11  | <i>C. coli</i>   | TKQ                              |                 |
| 6                 | W                        | 4WT6-12  | <i>C. jejuni</i> | TSKQ                             |                 |
| 6                 | W                        | 4WT6-13  | <i>C. coli</i>   | TK                               |                 |
| 6                 | W                        | 4WT6-14  | <i>C. jejuni</i> | TKQ                              |                 |
| 6                 | W                        | 4WT6-15  | <i>C. coli</i>   | TK                               |                 |
| 6                 | W                        | 4WT6-16  | <i>C. coli</i>   | TKQ                              |                 |
| 6                 | M                        | 4MT6-1   | <i>C. jejuni</i> | TKQ                              |                 |
| 6                 | M                        | 4MT6-2   | <i>C. jejuni</i> | TKQ                              |                 |
| 6                 | M                        | 4MT6-3   | <i>C. coli</i>   | TK                               |                 |
| 6                 | M                        | 4MT6-4   | <i>C. jejuni</i> | TKQ                              |                 |
| 6                 | M                        | 4MT6-5   | <i>C. coli</i>   | TK                               |                 |
| 6                 | M                        | 4MT6-6   | <i>C. jejuni</i> | TSKQ                             |                 |

| Time Point (Days) | Sample Type <sup>1</sup> | Isolate       | Species                 | Antimicrobial Resistance Profile | ST <sup>2</sup> |
|-------------------|--------------------------|---------------|-------------------------|----------------------------------|-----------------|
| 6                 | M                        | 4MT6-7        | <i>C. jejuni</i>        | TKQ                              |                 |
| 6                 | M                        | 4MT6-8        | <i>C. coli</i>          | TK                               |                 |
| 6                 | M                        | 4MT6-9        | <i>C. coli</i>          | TKQ                              |                 |
| 6                 | M                        | 4MT6-10       | <i>C. jejuni</i>        | TSKQ                             |                 |
| 6                 | M                        | 4MT6-11       | <i>C. jejuni</i>        | TKQ                              |                 |
| 6                 | M                        | 4MT6-12       | <i>C. jejuni</i>        | TKQ                              |                 |
| 6                 | M                        | 4MT6-13       | <i>C. jejuni</i>        | TKQ                              |                 |
| 6                 | M                        | 4MT6-14       | <i>C. jejuni</i>        | TKQ                              |                 |
| 6                 | M                        | 4MT6-15       | <i>C. jejuni</i>        | TKQ                              |                 |
| 6                 | M                        | 4MT6-16       | <i>C. coli</i>          | TKQ                              |                 |
| <b>8</b>          | <b>W</b>                 | <b>4WT8-1</b> | <b><i>C. jejuni</i></b> | <b>TSKQ</b>                      | <b>1839</b>     |
| 8                 | W                        | 4WT8-2        | <i>C. coli</i>          | TKQ                              |                 |
| 8                 | W                        | 4WT8-3        | <i>C. jejuni</i>        | TKQ                              |                 |
| 8                 | W                        | 4WT8-4        | <i>C. coli</i>          | TK                               |                 |
| 8                 | W                        | 4WT8-5        | <i>C. jejuni</i>        | TSKQ                             |                 |
| 8                 | W                        | 4WT8-6        | <i>C. jejuni</i>        | TSKQ                             |                 |
| 8                 | W                        | 4WT8-7        | <i>C. coli</i>          | TKQ                              |                 |
| 8                 | W                        | 4WT8-8        | <i>C. coli</i>          | TK                               |                 |
| 8                 | W                        | 4WT8-9        | <i>C. jejuni</i>        | TSKQ                             |                 |
| 8                 | W                        | 4WT8-10       | <i>C. coli</i>          | TK                               |                 |
| 8                 | W                        | 4WT8-11       | <i>C. jejuni</i>        | TSKQ                             |                 |
| 8                 | W                        | 4WT8-12       | <i>C. coli</i>          | TK                               |                 |
| 8                 | W                        | 4WT8-13       | <i>C. jejuni</i>        | TSKQ                             |                 |
| 8                 | M                        | 4MT8-1        | <i>C. coli</i>          | TKQ                              |                 |
| 8                 | M                        | 4MT8-2        | <i>C. coli</i>          | K                                |                 |
| 8                 | M                        | 4MT8-3        | <i>C. jejuni</i>        | TSKQ                             |                 |
| 8                 | M                        | 4MT8-4        | <i>C. coli</i>          | TK                               |                 |
| 8                 | M                        | 4MT8-5        | <i>C. jejuni</i>        | TSKQ                             |                 |
| 8                 | M                        | 4MT8-6        | <i>C. jejuni</i>        | TSKQ                             |                 |
| <b>8</b>          | <b>M</b>                 | <b>4MT8-7</b> | <b><i>C. jejuni</i></b> | <b>TSKQ</b>                      | <b>1839</b>     |
| <b>8</b>          | <b>M</b>                 | <b>4MT8-8</b> | <b><i>C. jejuni</i></b> | <b>TSKQ</b>                      | <b>1839</b>     |
| 8                 | M                        | 4MT8-9        | <i>C. coli</i>          | TK                               |                 |
| 8                 | M                        | 4MT8-10       | <i>C. coli</i>          | TKQ                              |                 |
| 8                 | M                        | 4MT8-11       | <i>C. jejuni</i>        | TKQ                              |                 |
| 8                 | M                        | 4MT8-12       | <i>C. jejuni</i>        | TKQ                              |                 |
| 8                 | M                        | 4MT8-13       | <i>C. jejuni</i>        | TKQ                              |                 |
| 8                 | M                        | 4MT8-14       | <i>C. coli</i>          | TKQ                              |                 |
| 8                 | M                        | 4MT8-15       | <i>C. jejuni</i>        | TKQ                              |                 |
| 8                 | M                        | 4MT8-16       | <i>C. jejuni</i>        | TKQ                              |                 |

| Time Point (Days) | Sample Type <sup>1</sup> | Isolate         | Species                 | Antimicrobial Resistance Profile | ST <sup>2</sup> |
|-------------------|--------------------------|-----------------|-------------------------|----------------------------------|-----------------|
| 10                | W                        | 4WT10-1         | <i>C. coli</i>          | TK                               |                 |
| 10                | W                        | 4WT10-2         | <i>C. coli</i>          | TK                               |                 |
| 10                | W                        | 4WT10-3         | <i>C. coli</i>          | TK                               |                 |
| 10                | W                        | 4WT10-4         | <i>C. coli</i>          | TKQ                              |                 |
| 10                | W                        | 4WT10-5         | <i>C. coli</i>          | TK                               |                 |
| 10                | W                        | 4WT10-6         | <i>C. coli</i>          | TKQ                              |                 |
| 10                | W                        | 4WT10-7         | <i>C. coli</i>          | TKQ                              |                 |
| 10                | W                        | 4WT10-8         | <i>C. coli</i>          | TKQ                              |                 |
| 10                | W                        | 4WT10-10        | <i>C. coli</i>          | TK                               |                 |
| 10                | W                        | 4WT10-11        | <i>C. coli</i>          | TK                               |                 |
| <b>10</b>         | <b>W</b>                 | <b>4WT10-12</b> | <b><i>C. jejuni</i></b> | <b>TKQ</b>                       | <b>1839</b>     |
| 10                | W                        | 4WT10-13        | <i>C. coli</i>          | TKQ                              |                 |
| 10                | W                        | 4WT10-14        | <i>C. coli</i>          | TSEKQ                            |                 |
| 10                | W                        | 4WT10-15        | <i>C. coli</i>          | TK                               |                 |
| 10                | M                        | 4MT10-1         | <i>C. coli</i>          | TKQ                              |                 |
| 10                | M                        | 4MT10-2         | <i>C. coli</i>          | TK                               |                 |
| <b>10</b>         | <b>M</b>                 | <b>4MT10-3</b>  | <b><i>C. jejuni</i></b> | <b>TSKQ</b>                      | <b>1839</b>     |
| 10                | M                        | 4MT10-4         | <i>C. jejuni</i>        | TKQ                              |                 |
| 10                | M                        | 4MT10-5         | <i>C. coli</i>          | TK                               |                 |
| 10                | M                        | 4MT10-6         | <i>C. jejuni</i>        | TSKQ                             |                 |
| 10                | M                        | 4MT10-7         | <i>C. jejuni</i>        | TSKQ                             |                 |
| 10                | M                        | 4MT10-8         | <i>C. jejuni</i>        | TSKQ                             |                 |
| 10                | M                        | 4MT10-9         | <i>C. coli</i>          | TKQ                              |                 |
| 10                | M                        | 4MT10-10        | <i>C. coli</i>          | TK                               |                 |
| 10                | M                        | 4MT10-11        | <i>C. coli</i>          | TK                               |                 |
| 10                | M                        | 4MT10-12        | <i>C. coli</i>          | TK                               |                 |
| 10                | M                        | 4MT10-13        | <i>C. coli</i>          | TKQ                              |                 |
| 10                | M                        | 4MT10-14        | <i>C. coli</i>          | TKQ                              |                 |
| 10                | M                        | 4MT10-15        | <i>C. coli</i>          | TKQ                              |                 |
| 10                | M                        | 4MT10-16        | <i>C. coli</i>          | TK                               |                 |
| 12                | M                        | 4MT12-1         | <i>C. jejuni</i>        | TSKQ                             |                 |
| 12                | M                        | 4MT12-3         | <i>C. coli</i>          | TKQ                              |                 |
| 12                | M                        | 4MT12-4         | <i>C. jejuni</i>        | TSKQ                             |                 |
| 12                | M                        | 4MT12-5         | <i>C. coli</i>          | TK                               |                 |
| 12                | M                        | 4MT12-6         | <i>C. jejuni</i>        | TSKQ                             |                 |
| 12                | M                        | 4MT12-7         | <i>C. jejuni</i>        | TSKQ                             |                 |
| 12                | M                        | 4MT12-8         | <i>C. coli</i>          | TK                               |                 |
| 12                | M                        | 4MT12-9         | <i>C. jejuni</i>        | TSKQ                             |                 |
| 12                | M                        | 4MT12-10        | <i>C. jejuni</i>        | TSKQ                             |                 |

| <b>Time Point (Days)</b> | <b>Sample Type<sup>1</sup></b> | <b>Isolate</b> | <b>Species</b>   | <b>Antimicrobial Resistance Profile</b> | <b>ST<sup>2</sup></b> |
|--------------------------|--------------------------------|----------------|------------------|-----------------------------------------|-----------------------|
| 12                       | M                              | 4MT12-11       | <i>C. coli</i>   | TSKQ                                    |                       |
| 12                       | M                              | 4MT12-12       | <i>C. jejuni</i> | TSKQ                                    |                       |
| 12                       | M                              | 4MT12-13       | <i>C. coli</i>   | TK                                      |                       |
| 12                       | M                              | 4MT12-14       | <i>C. coli</i>   | TKQ                                     |                       |

2

3

4 <sup>1</sup> M and W indicate feces and water, respectively5 <sup>2</sup> ST, sequence type, determined by multi-locus sequence typing (MLST). Isolates genotyped with MLST

6 are in bold font.

7

8 **Table S2.** *Campylobacter jejuni* and *C. coli* isolates genotyped by multilocus sequence typing.

| Species          | Isolate  | Source | Time (day) | ST   | AMR   | Allele     |            |            |            |            |            |            |
|------------------|----------|--------|------------|------|-------|------------|------------|------------|------------|------------|------------|------------|
|                  |          |        |            |      |       | <i>asp</i> | <i>atp</i> | <i>gln</i> | <i>glt</i> | <i>gly</i> | <i>pgm</i> | <i>tkt</i> |
| <i>C. coli</i>   | 2MT0-1   | Feces  | 0          | 1101 | TSEKQ | 33         | 41         | 39         | 30         | 82         | 189        | 43         |
|                  | 4MT0-2   | Feces  | 0          | 1101 | TSEKQ | 33         | 41         | 39         | 30         | 82         | 189        | 43         |
|                  | 2MT0-13  | Feces  | 0          | 1161 | TQ    | 103        | 79         | 110        | 103        | 171        | 188        | 169        |
|                  | 2MT4-3   | Feces  | 4          | 1161 | TQ    | 103        | 79         | 110        | 103        | 171        | 188        | 169        |
|                  | 2MT8-2   | Feces  | 8          | 1161 | TQ    | 103        | 79         | 110        | 103        | 171        | 188        | 169        |
|                  | MT0-1    | Feces  | 0          | 1192 | TKQ   | 103        | 79         | 110        | 103        | 172        | 188        | 169        |
|                  | WT4-4    | Water  | 4          | 1192 | TSKQ  | 103        | 79         | 110        | 103        | 172        | 188        | 169        |
|                  | 2MT10-11 | Feces  | 10         | 1192 | TKQ   | 103        | 79         | 110        | 103        | 172        | 188        | 169        |
|                  | 2MT0-3   | Feces  | 0          | 1833 | TKQ   | 103        | 79         | 110        | 103        | 172        | 188        | 261        |
|                  | 2MT0-10  | Feces  | 0          | 1833 | TK    | 103        | 79         | 110        | 103        | 172        | 188        | 261        |
|                  | MT2-2    | Feces  | 2          | 1833 | TK    | 103        | 79         | 110        | 103        | 172        | 188        | 261        |
|                  | 2MT2-8   | Feces  | 2          | 1833 | TK    | 103        | 79         | 110        | 103        | 172        | 188        | 261        |
|                  | 2MT10-12 | Feces  | 10         | 1833 | TK    | 103        | 79         | 110        | 103        | 172        | 188        | 261        |
|                  | 2MT10-16 | Feces  | 10         | 1833 | TK    | 103        | 79         | 110        | 103        | 172        | 188        | 261        |
|                  | MT16-9   | Feces  | 16         | 1833 | TK    | 103        | 79         | 110        | 103        | 172        | 188        | 261        |
| <i>C. jejuni</i> | MT0-2    | Feces  | 0          | 1839 | TSKQ  | 2          | 35         | 222        | 29         | 250        | 303        | 25         |
|                  | 2MT0-2   | Feces  | 0          | 1839 | TKQ   | 2          | 35         | 222        | 29         | 250        | 303        | 25         |
|                  | 2WT0-13  | Water  | 0          | 1839 | TKQ   | 2          | 35         | 222        | 29         | 250        | 303        | 25         |
|                  | MT2-4    | Feces  | 2          | 1839 | TSKQ  | 2          | 35         | 222        | 29         | 250        | 303        | 25         |
|                  | 4MT2-3   | Feces  | 2          | 1839 | TKQ   | 2          | 35         | 222        | 29         | 250        | 303        | 25         |
|                  | WT2-1    | Water  | 2          | 1839 | TSKQ  | 2          | 35         | 222        | 29         | 250        | 303        | 25         |
|                  | WT2-2    | Water  | 2          | 1839 | TKQ   | 2          | 35         | 222        | 29         | 250        | 303        | 25         |
|                  | 4WT2-5   | Water  | 2          | 1839 | TKQ   | 2          | 35         | 222        | 29         | 250        | 303        | 25         |
|                  | 4MT8-7   | Feces  | 8          | 1839 | TSKQ  | 2          | 35         | 222        | 29         | 250        | 303        | 25         |
|                  | 4MT8-8   | Feces  | 8          | 1839 | TSKQ  | 2          | 35         | 222        | 29         | 250        | 303        | 25         |
|                  | 4WT8-1   | Water  | 8          | 1839 | TSKQ  | 2          | 35         | 222        | 29         | 250        | 303        | 25         |
|                  | 4MT10-3  | Feces  | 10         | 1839 | TSKQ  | 2          | 35         | 222        | 29         | 250        | 303        | 25         |
|                  | 4WT10-12 | Water  | 10         | 1839 | TKQ   | 2          | 35         | 222        | 29         | 250        | 303        | 25         |
|                  | MT16-5   | Feces  | 16         | 2934 | TKQ   | 7          | 6          | 112        | 5          | 2          | 167        | 67         |
|                  | MT12-5   | Feces  | 12         | 2935 | TSQ   | 2          | 35         | 1          | 29         | 250        | 303        | 25         |
|                  | MT14-4   | Feces  | 14         | 2935 | TSQ   | 2          | 35         | 1          | 29         | 250        | 303        | 25         |
|                  | MT16-2   | Feces  | 16         | 2935 | TSQ   | 2          | 35         | 1          | 29         | 250        | 303        | 25         |
|                  | 2MT2-4   | Feces  | 2          | 7731 | TEKQ  | 103        | 79         | 110        | 103        | 172        | 742        | 169        |
| MT12-9           | Feces    | 12     | 9193       | TKQ  | 103   | 79         | 110        | 103        | 171        | 188        | 67         |            |
